# Supplementary material for: An assessment of the immune costs associated with meiotic drive elements in Drosophila
Source: PubMed Central journal article supplement (PMC6784720; doi:10.1098/rspb.2019.1534), 2019-09-18
Supplement: rspb20191534supp2.pdf [file rspb20191534supp2.pdf]

**Supplemental Figures:**

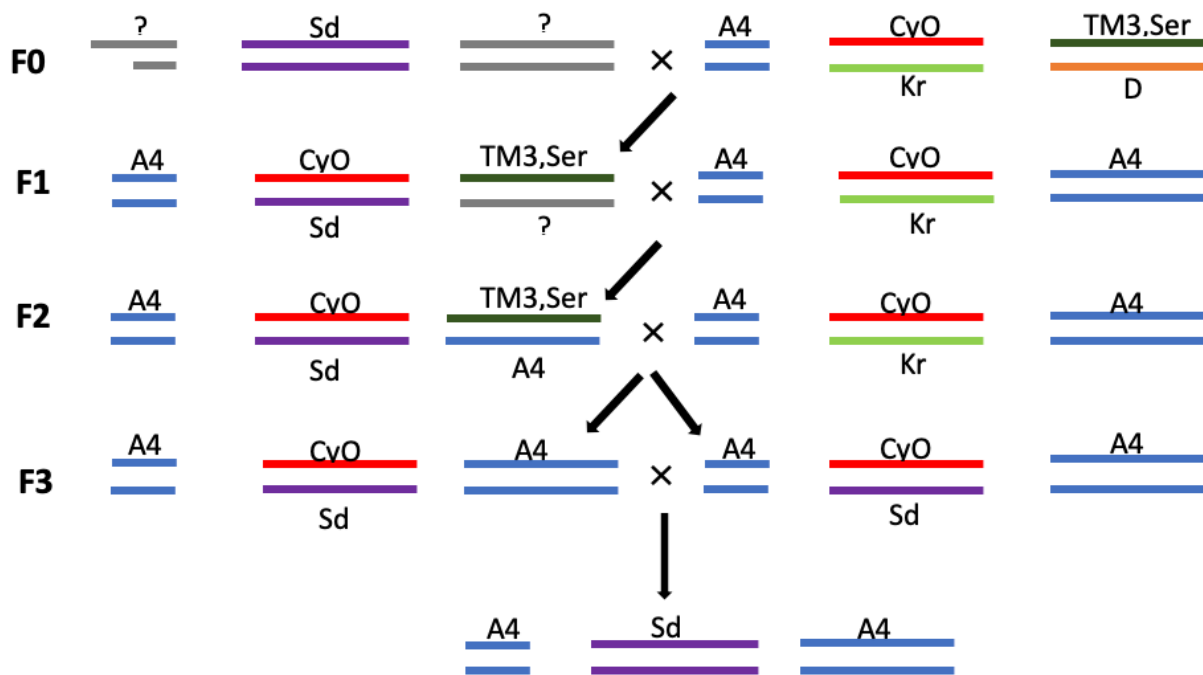

**Figure S1. Crossing scheme to generate *D. melanogaster* lines with isogenic**

**backgrounds.** In order to move the Sd 2<sup>nd</sup> chromosome into an A4 background males from the original Sd and control Zambia lines were crossed to female virgins from lines containing balancers that produced mutant phenotypes and to sisters in the final cross. In F0 the original lines' males (F0, left) were crossed to female virgins with double balancers on the 2<sup>nd</sup> and 3<sup>rd</sup> chromosome and an A4 X (F0, right). The resulting normal-eyed, curly and serrated winged males sired from the F0 cross carrying the A4 X (F1, left) were crossed to virgin females with fixed A4 X and 3<sup>rd</sup> chromosome (F1, right). Normal-eyed, curly and serrated winged male progeny heterozygous for A4 on the 3<sup>rd</sup> chromosome (F2, left) were then backcrossed to their mothers (F2, right) to clean up the 3<sup>rd</sup> chromosome. This produced normal-eyed, curly winged males fixed with A4 X and 3<sup>rd</sup> chromosome and heterozygous for Sd on their 2<sup>nd</sup> (F3, left) which were crossed to their sisters carrying the same genetic background (F3, right). Finally, straight

winged normal-eyed progeny, with exception for Sd homozygous lethal lines maintained over the Cyo balancer, were selected for and crossed to each other to maintain lines with fixed A4 X, A4 3<sup>rd</sup> chromosome, and homozygous Sd 2<sup>nd</sup> chromosome.
